# Supplementary material for: Heat Pumps, Wood Biomass and Fossil Fuel Solutions in the Renovation of Buildings: A Techno-Economic Analysis Applied to Piedmont Region (NW Italy)
Source: MDPI journal article supplement (doi:10.3390/en15072375), 2022-03-24
Supplement: s1 [file s1]

# Heat pumps, wood biomass and fossil-fuel solutions in the renovation of buildings: a techno-economic analysis applied to Piedmont Region (NW Italy)

## Supplementary materials

Edoardo Ruffino, Bruno Piga, Alessandro Casasso, Rajandrea Sethi  
Politecnico di Torino – Department of Environment, Land, and Infrastructure Engineering (DIATI),  
Corso Duca Degli Abruzzi 24, 10129 Torino (Italy); edoardo.ruffino@gmail.com (E.R.);  
bruno.piga89@gmail.com (B.P.); rajandrea.sethi@polito.it (R.S.)

\* Correspondence: alessandro.casasso@polito.it (A.C.); Tel.: +39-3204213886

## Abstract

The levelized cost of heat (LCOH) and the technical feasibility in the specific context of building construction or renovation are the major drivers of users' choices for space heating and cooling solutions. In this work, the LCOH was assessed for the most diffused heating technologies in Piedmont (NW Italy): that is, fossil fuels (methane, heating oil, and liquefied petroleum gas – LPG), wood biomass (wood logs and pellet), and heat pumps (air-source and ground-source), both in heating-only and in heating-and-cooling configuration. A sensitivity analysis of the main LCOH drivers was performed to assess whether and how each technology is vulnerable to energy price and upfront cost changes. The results show that heat pumps are competitive against gas boilers, but they are heavily dependent on refurbishment incentives and penalized by the high electricity prices in Italy; on the other hand, wood biomasses are competitive even in the absence of incentives. The analysis confirmed that LPG and heating oil are no more competitive with renewable heating. Acting on the taxation of natural gas and electricity is key to making heat pumps the most economically convenient solution to cover heating and cooling needs of buildings.

---

**Keywords:** LCOH; life-cycle cost; heating; cooling; heat pump; fossil fuel; biomass; greenhouse gas.

---

## Sommario

|                                                            |    |
|------------------------------------------------------------|----|
| Abstract.....                                              | 1  |
| S.1. Introduction .....                                    | 3  |
| S.2. Methods.....                                          | 4  |
| S.2.1 Heating, cooling, and domestic hot water needs ..... | 4  |
| S.2.2 Sizing of radiators.....                             | 7  |
| S.2.3 Sizing of borehole heat exchangers (BHEs).....       | 8  |
| S.2.4 Sizing of photovoltaic systems .....                 | 11 |
| S.2.5 Energy and fuel consumption .....                    | 12 |
| S.3. Sensitivity analysis .....                            | 14 |
| Abbreviations and symbols.....                             | 17 |
| References .....                                           | 18 |

## S.1. Introduction

*Table S1. Electricity prices for household and non-household consumers. Minimum, maximum, and median are related to the choice of Eurostat (2020) to subdivide each class of prices according to consumption ranges.*

| Customers                       | Taxes and levies                           | Minimum price (€/kWh) | Maximum price (€/kWh) | Median price (€/kWh) |
|---------------------------------|--------------------------------------------|-----------------------|-----------------------|----------------------|
| Household consumers (ITA)       | Excluding all                              | 0.10                  | 0.29                  | 0.13                 |
|                                 | Excluding VAT/recoverable taxes and levies | 0.16                  | 0.42                  | 0.20                 |
|                                 | Including all                              | 0.18                  | 0.46                  | 0.22                 |
| Non-household consumers (ITA)   | Excluding all                              | 0.06                  | 0.16                  | 0.08                 |
|                                 | Excluding VAT/recoverable taxes and levies | 0.07                  | 0.26                  | 0.13                 |
|                                 | Including all                              | 0.07                  | 0.32                  | 0.15                 |
| Household consumers (EU-27)     | Excluding all                              | 0.10                  | 0.27                  | 0.13                 |
|                                 | Excluding VAT/recoverable taxes and levies | 0.15                  | 0.34                  | 0.18                 |
|                                 | Including all                              | 0.18                  | 0.39                  | 0.21                 |
| Non-household consumers (EU-27) | Excluding all                              | 0.05                  | 0.15                  | 0.07                 |
|                                 | Excluding VAT/recoverable taxes and levies | 0.06                  | 0.21                  | 0.11                 |
|                                 | Including all                              | 0.11                  | 0.98                  | 0.17                 |

## S.2. Methods

### S.2.1 Heating, cooling, and domestic hot water needs

Heating, cooling, and domestic hot water (DHW) loads are reported in the following tables. Heating needs diminish as the insulation improves, and vice versa for cooling loads: however, the reduction of heating loads decreasing is always higher than the increase for cooling.

The DHW demand has been assumed as constant and depending on the number of occupants (4 per each housing unit).

*Table S2. Heating loads (KWh/year) for the single-detached house.*

| Month        | Turin             |                    |                     | Oulx              |                    |                     |
|--------------|-------------------|--------------------|---------------------|-------------------|--------------------|---------------------|
|              | Original building | Partial renovation | Complete renovation | Original building | Partial renovation | Complete renovation |
| January      | 6809              | 6207               | 2016                | 8786              | 7976               | 2449                |
| February     | 5276              | 4806               | 1459                | 7057              | 6403               | 1864                |
| March        | 3599              | 3265               | 812                 | 5557              | 5032               | 1294                |
| April        | 1188              | 1069               | 211                 | 2956              | 2665               | 590                 |
| May          | 0                 | 0                  | 0                   | 0                 | 0                  | 0                   |
| June         | 0                 | 0                  | 0                   | 0                 | 0                  | 0                   |
| July         | 0                 | 0                  | 0                   | 0                 | 0                  | 0                   |
| August       | 0                 | 0                  | 0                   | 0                 | 0                  | 0                   |
| September    | 0                 | 0                  | 0                   | 0                 | 0                  | 0                   |
| October      | 1494              | 1348               | 309                 | 3687              | 3326               | 794                 |
| November     | 4418              | 4017               | 1200                | 6331              | 5738               | 1677                |
| December     | 6261              | 5704               | 1844                | 8240              | 7477               | 2294                |
| <b>TOTAL</b> | 29046             | 26416              | 7851                | 42614             | 38617              | 10962               |

*Table S3. Cooling loads (KWh/year) for the single-detached house.*

| Month        | Turin             |                    |                     | Oulx              |                    |                     |
|--------------|-------------------|--------------------|---------------------|-------------------|--------------------|---------------------|
|              | Original building | Partial renovation | Complete renovation | Original building | Partial renovation | Complete renovation |
| January      | 0                 | 0                  | 0                   | 0                 | 0                  | 0                   |
| February     | 0                 | 0                  | 0                   | 0                 | 0                  | 0                   |
| March        | 0                 | 0                  | 0                   | 0                 | 0                  | 0                   |
| April        | 0                 | 0                  | 0                   | 0                 | 0                  | 0                   |
| May          | 0                 | 0                  | 108                 | 0                 | 0                  | 0                   |
| June         | 136               | 128                | 632                 | 0                 | 0                  | 123                 |
| July         | 586               | 569                | 883                 | 0                 | 0                  | 294                 |
| August       | 143               | 136                | 612                 | 0                 | 0                  | 98                  |
| September    | 0                 | 0                  | 103                 | 0                 | 0                  | 0                   |
| October      | 0                 | 0                  | 0                   | 0                 | 0                  | 0                   |
| November     | 0                 | 0                  | 0                   | 0                 | 0                  | 0                   |
| December     | 0                 | 0                  | 0                   | 0                 | 0                  | 0                   |
| <b>TOTAL</b> | 866               | 833                | 2338                | 0                 | 0                  | 514                 |

Table S4. DHW loads (KWh/year) for the single-detached house.

| Month        | Turin             |                    |                     | Oulx              |                    |                     |
|--------------|-------------------|--------------------|---------------------|-------------------|--------------------|---------------------|
|              | Original building | Partial renovation | Complete renovation | Original building | Partial renovation | Complete renovation |
| January      | 194               | 194                | 194                 | 228               | 228                | 228                 |
| February     | 175               | 175                | 175                 | 206               | 206                | 206                 |
| March        | 194               | 194                | 194                 | 228               | 228                | 228                 |
| April        | 187               | 187                | 187                 | 221               | 221                | 221                 |
| May          | 194               | 194                | 194                 | 228               | 228                | 228                 |
| June         | 187               | 187                | 187                 | 221               | 221                | 221                 |
| July         | 194               | 194                | 194                 | 228               | 228                | 228                 |
| August       | 194               | 194                | 194                 | 228               | 228                | 228                 |
| September    | 187               | 187                | 187                 | 221               | 221                | 221                 |
| October      | 194               | 194                | 194                 | 228               | 228                | 228                 |
| November     | 187               | 187                | 187                 | 221               | 221                | 221                 |
| December     | 194               | 194                | 194                 | 228               | 228                | 228                 |
| <b>TOTAL</b> | 2280              | 2280               | 2280                | 2683              | 2683               | 2683                |

Table S5. Heating loads (KWh/year) for the apartment block.

| Month        | Turin             |                    |                     | Oulx              |                    |                     |
|--------------|-------------------|--------------------|---------------------|-------------------|--------------------|---------------------|
|              | Original building | Partial renovation | Complete renovation | Original building | Partial renovation | Complete renovation |
| January      | 27993             | 24738              | 5313                | 36772             | 32606              | 7012                |
| February     | 21218             | 18672              | 3293                | 28921             | 25562              | 4854                |
| March        | 13530             | 11714              | 1008                | 21722             | 19023              | 2511                |
| April        | 4170              | 3524               | 17                  | 11036             | 9548               | 722                 |
| May          | 0                 | 0                  | 0                   | 0                 | 0                  | 0                   |
| June         | 0                 | 0                  | 0                   | 0                 | 0                  | 0                   |
| July         | 0                 | 0                  | 0                   | 0                 | 0                  | 0                   |
| August       | 0                 | 0                  | 0                   | 0                 | 0                  | 0                   |
| September    | 0                 | 0                  | 0                   | 0                 | 0                  | 0                   |
| October      | 5324              | 4646               | 249                 | 14077             | 12224              | 1140                |
| November     | 17507             | 15340              | 2422                | 25925             | 22881              | 4184                |
| December     | 25629             | 22617              | 4732                | 34434             | 30509              | 6486                |
| <b>TOTAL</b> | 115372            | 101250             | 17034               | 172887            | 152353             | 26909               |

Table S6. Cooling loads (KWh/year) for the apartment block.

| Month        | Turin             |                    |                     | Oulx              |                    |                     |
|--------------|-------------------|--------------------|---------------------|-------------------|--------------------|---------------------|
|              | Original building | Partial renovation | Complete renovation | Original building | Partial renovation | Complete renovation |
| January      | 0                 | 0                  | 0                   | 0                 | 0                  | 0                   |
| February     | 0                 | 0                  | 0                   | 0                 | 0                  | 0                   |
| March        | 0                 | 0                  | 0                   | 0                 | 0                  | 0                   |
| April        | 0                 | 0                  | 319                 | 0                 | 0                  | 0                   |
| May          | 93                | 137                | 3152                | 0                 | 0                  | 1178                |
| June         | 3124              | 3272               | 5901                | 127               | 177                | 3578                |
| July         | 5859              | 5729               | 6930                | 431               | 529                | 4464                |
| August       | 3151              | 3241               | 5521                | 124               | 179                | 3111                |
| September    | 95                | 150                | 2820                | 0                 | 0                  | 814                 |
| October      | 0                 | 0                  | 168                 | 0                 | 0                  | 0                   |
| November     | 0                 | 0                  | 0                   | 0                 | 0                  | 0                   |
| December     | 0                 | 0                  | 0                   | 0                 | 0                  | 0                   |
| <b>TOTAL</b> | 12322             | 12529              | 24812               | 682               | 885                | 13144               |

Table S7. DHW loads (KWh/year) for apartment block.

| Month        | Turin             |                    |                     | Oulx              |                    |                     |
|--------------|-------------------|--------------------|---------------------|-------------------|--------------------|---------------------|
|              | Original building | Partial renovation | Complete renovation | Original building | Partial renovation | Complete renovation |
| January      | 1207              | 1207               | 1207                | 1421              | 1421               | 1421                |
| February     | 1091              | 1091               | 1091                | 1283              | 1283               | 1283                |
| March        | 1207              | 1207               | 1207                | 1421              | 1421               | 1421                |
| April        | 1168              | 1168               | 1168                | 1375              | 1375               | 1375                |
| May          | 1207              | 1207               | 1207                | 1421              | 1421               | 1421                |
| June         | 1168              | 1168               | 1168                | 1375              | 1375               | 1375                |
| July         | 1207              | 1207               | 1207                | 1421              | 1421               | 1421                |
| August       | 1207              | 1207               | 1207                | 1421              | 1421               | 1421                |
| September    | 1168              | 1168               | 1168                | 1375              | 1375               | 1375                |
| October      | 1207              | 1207               | 1207                | 1421              | 1421               | 1421                |
| November     | 1168              | 1168               | 1168                | 1375              | 1375               | 1375                |
| December     | 1207              | 1207               | 1207                | 1421              | 1421               | 1421                |
| <b>TOTAL</b> | 14215             | 14215              | 14215               | 16729             | 16729              | 16729               |

### S.2.2 Sizing of radiators

Concerning the simulation of buildings from the 60s and 70s, it is necessary to consider that the radiators installed used to be designed to work at high temperatures, whereas heat pumps (and, to a lesser extent, condensing boilers) need to work at much lower temperatures. A high-temperature radiator provides an inlet temperature of about 80 °C and an outlet temperature of 60 °C (-> average temperature 70°C), while condensing boilers and heat pumps reach high efficiencies with a flow of water at 50-55 °C and 35-45 °C, respectively. In addition, radiators typically operate with a temperature difference between inlet and outlet of 20 °C, while most heat pumps are designed for a supply and return temperature difference of 5 °C. This obstacle can be overcome with a heat storage tank or, if the distribution network permits it, by increasing the flow rate.

Tables 8 and 9 report the sizing results for the detached house and the block of flats, respectively. The tables report the inlet temperature, the number of elements needed, the nominal power of the radiators, the peak heating power per unit surface, the flow rate required for the distribution system and the difference compared to the base case. Considering that the advised flow velocity for heating networks is 1-2 m/s, a maximum increase of flow rate of 76% is acceptable if the initial distribution system was sized appropriately.

*Table S8. Sizing of radiators for the single-detached house configurations.*

| Renovation project                        | Location | Type     | T <sub>in</sub> (°C) | Number of elements | Power per housing unit (kW) | Power per unit of surface (W/m <sup>2</sup> ) | Flow rate (kg/h) | Δ <sub>flowrate</sub> (%) |
|-------------------------------------------|----------|----------|----------------------|--------------------|-----------------------------|-----------------------------------------------|------------------|---------------------------|
| Original building                         | Turin    | Radiator | 80                   | 109                | 15.3                        | 95.6                                          | 440.74           | 0%                        |
|                                           | Oulx     | Radiator | 80                   | 133                | 18.7                        | 116.9                                         | 581.43           | 0%                        |
| Partial renovation                        | Turin    | Radiator | 45                   | 114                | 13.7                        | 85.8                                          | 775.62           | 76%                       |
|                                           | Oulx     | Radiator | 45                   | 136                | 16.3                        | 102.3                                         | 1018.35          | 75%                       |
| Complete renovation (heating-only)        | Turin    | Radiator | 45                   | 35                 | 4.6                         | 30.6                                          | 239.15           | -46%                      |
|                                           | Oulx     | Radiator | 45                   | 43                 | 5.6                         | 37.5                                          | 290.47           | -50%                      |
| Complete renovation (heating and cooling) | Turin    | Fan coil | 45                   | -                  | 6.4                         | 42.7                                          | 164.28           | -63%                      |
|                                           | Oulx     | Fan coil | 45                   | -                  | 7.8                         | 52.2                                          | 200.17           | -66%                      |

*Table S9. Sizing of radiators for the apartment block configurations.*

| Renovation project                        | Location | Type     | T <sub>in</sub> (°C) | Number of elements | Power per housing unit (kW) | Power per unit of surface (W/m <sup>2</sup> ) | Flow rate (kg/h) | Δ <sub>flowrate</sub> (%) |
|-------------------------------------------|----------|----------|----------------------|--------------------|-----------------------------|-----------------------------------------------|------------------|---------------------------|
| Original building                         | Turin    | Radiator | 80                   | 59                 | 8.31                        | 88.8                                          | 240.24           | 0%                        |
|                                           | Oulx     | Radiator | 80                   | 71                 | 9.99                        | 106.7                                         | 311              | 0%                        |
| Partial renovation                        | Turin    | Radiator | 45                   | 62                 | 7.49                        | 80.0                                          | 421.96           | 76%                       |
|                                           | Oulx     | Radiator | 45                   | 76                 | 9.10                        | 97.2                                          | 546.81           | 76%                       |
| Complete renovation (heating-only)        | Turin    | Radiator | 40                   | 17                 | 1.68                        | 18.0                                          | 75.32            | -69%                      |
|                                           | Oulx     | Radiator | 40                   | 21                 | 2.02                        | 21.6                                          | 103.03           | -67%                      |
| Complete renovation (heating and cooling) | Turin    | Fan coil | 45                   | -                  | 2.01                        | 21.5                                          | 51.59            | -79%                      |
|                                           | Oulx     | Fan coil | 45                   | -                  | 2.78                        | 29.7                                          | 67.52            | -72%                      |

### S.2.3 Sizing of borehole heat exchangers (BHEs)

Borehole heat exchangers (BHEs) were sized using the software Earth Energy Design (EED) (BLOCON, 2016), which is based on the subsurface heat transport model of Eskilson (Eskilson, 1987). Once the ground and fluid characteristics were set as indicated in the article, EED requires building thermal needs (kWh) and heat pumps peak power (kW) as inputs.

Therefore, the results of the EED simulations are the dimensional properties of the BHEs, which are reported in the following tables. In this case, vertical boreholes were considered; therefore, the dispositions and the measures of distance and occupied area are related to horizontal dimension, whereas length to vertical one.



Table S10. BHEs characteristics for the heating-only case.

| Thermal conductivity (W/mK) | Building              | Renovation | Location | BHE no. | Arrangement           | Distance (m) | Well length (m) | Total length (m) | Occupied area (m <sup>2</sup> ) |
|-----------------------------|-----------------------|------------|----------|---------|-----------------------|--------------|-----------------|------------------|---------------------------------|
| 1.6 (low)                   | Single-detached house | Partial    | Turin    | 2       | 1 x 2 line            | 16           | 114             | 228              | 16                              |
|                             |                       |            | Oulx     | 4       | 2 x 2 rectangle       | 19           | 102             | 408              | 19                              |
|                             |                       | Complete   | Turin    | 1       | Single                | 0            | 93              | 93               | 1                               |
|                             |                       |            | Oulx     | 2       | 1 x 2 line            | 10           | 75              | 150              | 10                              |
|                             | Apartment block       | Partial    | Turin    | 12      | 4 x 4 rectangle       | 6            | 108             | 1296             | 324                             |
|                             |                       |            | Oulx     | 36      | 6 x 6 rectangle       | 5            | 107             | 3852             | 625                             |
|                             |                       | Complete   | Turin    | 2       | 1 x 2 line            | 16           | 110             | 220              | 16                              |
|                             |                       |            | Oulx     | 4       | 2 x 2 rectangle       | 19           | 107             | 428              | 361                             |
| 2.4 (average)               | Single-detached house | Partial    | Turin    | 2       | 1 x 2 line            | 10           | 93              | 186              | 10                              |
|                             |                       |            | Oulx     | 3       | 2 x 2 L-shape         | 19           | 106             | 318              | 19                              |
|                             |                       | Complete   | Turin    | 1       | Single                | 0            | 77              | 77               | 1                               |
|                             |                       |            | Oulx     | 1       | Single                | 0            | 111             | 111              | 1                               |
|                             | Apartment block       | Partial    | Turin    | 8       | 3 x 3 open rectangle  | 9            | 111             | 888              | 324                             |
|                             |                       |            | Oulx     | 18      | 5 x 6 open rectangle  | 5            | 119             | 2142             | 500                             |
|                             |                       | Complete   | Turin    | 2       | 1 x 2 line            | 12           | 87              | 174              | 12                              |
|                             |                       |            | Oulx     | 3       | 2 x 2 L-configuration | 19           | 111             | 333              | 361                             |
| 3.2 (high)                  | Single-detached house | Partial    | Turin    | 2       | 1 x 2 line            | 9            | 79              | 158              | 9                               |
|                             |                       |            | Oulx     | 3       | 1 x 2 line            | 17           | 92              | 276              | 17                              |
|                             |                       | Complete   | Turin    | 1       | Single                | 0            | 68              | 68               | 1                               |
|                             |                       |            | Oulx     | 1       | Single                | 0            | 97              | 97               | 1                               |
|                             | Apartment block       | Partial    | Turin    | 6       | 2 x 3 rectangle       | 9            | 119             | 714              | 162                             |
|                             |                       |            | Oulx     | 13      | 5 x 5 U-configuration | 6            | 118             | 1534             | 576                             |
|                             |                       | Complete   | Turin    | 2       | 1 x 2 line            | 10           | 72              | 144              | 10                              |
|                             |                       |            | Oulx     | 3       | 2 x 2 L-configuration | 17           | 96              | 288              | 17                              |

Table S11. BHEs characteristics for the heating and cooling case (completely renovated buildings).

| Thermal conductivity (W/mK) | Building              | Location | BHE no. | Arrangement           | Distance (m) | Well length (m) | Total length (m) | Occupied area (m <sup>2</sup> ) |
|-----------------------------|-----------------------|----------|---------|-----------------------|--------------|-----------------|------------------|---------------------------------|
| 1.6 (low)                   | Single-detached house | Turin    | 1       | Single                | 0            | 87              | 87               | 1                               |
|                             |                       | Oulx     | 2       | 1 x 2 line            | 9            | 73              | 146              | 9                               |
|                             | Apartment block       | Turin    | 3       | 2 x 2 L-configuration | 13           | 120             | 360              | 169                             |
|                             |                       | Oulx     | 3       | 2 x 2 L-configuration | 14           | 119             | 357              | 196                             |
| 2.4 (average)               | Single-detached house | Turin    | 1       | Single                | 0            | 73              | 73               | 1                               |
|                             |                       | Oulx     | 1       | Single                | 0            | 108             | 108              | 1                               |
|                             | Apartment block       | Turin    | 3       | 1 x 3 line            | 8            | 85              | 255              | 16                              |
|                             |                       | Oulx     | 3       | 1 x 3 line            | 9            | 100             | 300              | 18                              |
| 3.2 (high)                  | Single-detached house | Turin    | 1       | Single                | 0            | 65              | 65               | 1                               |
|                             |                       | Oulx     | 1       | Single                | 0            | 94              | 94               | 1                               |
|                             | Apartment block       | Turin    | 2       | 1 x 2 line            | 6            | 107             | 214              | 6                               |
|                             |                       | Oulx     | 3       | 1 x 3 line            | 9            | 85              | 255              | 18                              |

#### S.2.4 Sizing of photovoltaic systems

The installed capacity was sized based on the electricity needs (overall kWh requested in one year) of each thermal plant. Table 12 reports the sizing results for the heating-only configuration, whereas Table 13 reports the results for the heating-and-cooling configuration.

Concerning heating-only solutions, the installed capacity exceeded the requirements set by the Legislative Decree 28/2011 (Repubblica Italiana, 2011) for every heat pump configuration with the only exception of the insulated single-detached house, since the heating loads are very low; the same occurred for the heating-and-cooling case.

*Table S12. Installed capacity (kW) of photovoltaic panels in the heating-only scenario (each panel provides for 300 W).*

| Building              | Renovation level | Location | NG | LPG | OIL | WL | PEL | AS | GS |
|-----------------------|------------------|----------|----|-----|-----|----|-----|----|----|
| Single-detached house | Partial          | Turin    | 0  | 0   | 0   | 0  | 0   | 28 | 21 |
|                       |                  | Oulx     | 0  | 0   | 0   | 0  | 0   | 39 | 33 |
|                       | Complete         | Turin    | 0  | 0   | 0   | 0  | 0   | 13 | 13 |
|                       |                  | Oulx     | 0  | 0   | 0   | 0  | 0   | 13 | 13 |
| Apartment block       | Partial          | Turin    | 0  | 0   | 0   | 0  | 0   | 66 | 66 |
|                       |                  | Oulx     | 0  | 0   | 0   | 0  | 0   | 66 | 66 |
|                       | Complete         | Turin    | 0  | 0   | 0   | 0  | 0   | 29 | 22 |
|                       |                  | Oulx     | 0  | 0   | 0   | 0  | 0   | 43 | 31 |

*Table S13 Installed capacity (kW) of photovoltaic panels in the heating & cooling scenario (each panel provides for 300 W).*

| Building              | Renovation project | Location | NG | LPG | OIL | WL | PEL | AS | GS |
|-----------------------|--------------------|----------|----|-----|-----|----|-----|----|----|
| Single-detached house | Complete           | Turin    | 13 | 13  | 13  | 13 | 13  | 13 | 13 |
|                       |                    | Oulx     | 13 | 13  | 13  | 13 | 13  | 16 | 13 |
| Apartment block       |                    | Turin    | 30 | 30  | 30  | 30 | 30  | 60 | 43 |
|                       |                    | Oulx     | 18 | 18  | 18  | 18 | 18  | 66 | 45 |

### S.2.5 Energy and fuel consumption

The annual amount of energy shown in the tables below corresponds to the fuel used by combustion technologies and the electricity used by heat pumps that would be drawn from the grid in the absence of batteries (i.e., the amount of electricity from PV that is not directly self-consumed). The amount of fuel represents a direct source of expense since it is purchased from the market, while the electricity is the basis for battery sizing.

*Table S14. Annual amount of energy (in MWh) produced extra situ and delivered to the plant for heating and DHW only. Concerning heat pumps, the values refer to electrical power and do not consider batteries, whereas thermal energy regarding the other technologies.*

| Benchmark building    | Location | Thermal plant | Original building | Partial renovation | Complete renovation |
|-----------------------|----------|---------------|-------------------|--------------------|---------------------|
| Single-detached house | Turin    | Natural gas   | 44.9              | 33.8               | 10.9                |
|                       |          | LPG           | 44.9              | 33.8               | 10.9                |
|                       |          | Oil           | 45.2              | 33.8               | 10.9                |
|                       |          | Wood          | 50.0              | 35.6               | 11.4                |
|                       |          | Pellet        | 50.0              | 33.6               | 10.8                |
|                       |          | ASHP          | 0.0               | 6.2                | 1.5                 |
|                       |          | GSHP          | 0.0               | 4.3                | 0.8                 |
|                       | Oulx     | Natural gas   | 65.9              | 51.0               | 14.5                |
|                       |          | LPG           | 65.9              | 51.0               | 14.5                |
|                       |          | Oil           | 66.2              | 51.0               | 14.5                |
|                       |          | Wood          | 73.4              | 49.3               | 15.1                |
|                       |          | Pellet        | 73.4              | 49.3               | 14.3                |
|                       |          | ASHP          | 0.0               | 9.3                | 2.6                 |
|                       |          | GSHP          | 0.0               | 6.5                | 1.5                 |
| Apartment block       | Turin    | Natural gas   | 176.0             | 134.2              | 32.1                |
|                       |          | LPG           | 176.0             | 134.2              | 32.1                |
|                       |          | Oil           | 176.0             | 134.2              | 32.1                |
|                       |          | Wood          | 197.1             | 136.6              | 33.3                |
|                       |          | Pellet        | 197.1             | 128.8              | 31.4                |
|                       |          | ASHP          | 0.0               | 27.8               | 4.7                 |
|                       |          | GSHP          | 0.0               | 15.4               | 3.0                 |
|                       | Oulx     | Natural gas   | 262.1             | 197.3              | 45.5                |
|                       |          | LPG           | 262.1             | 197.3              | 45.5                |
|                       |          | Oil           | 262.1             | 197.3              | 45.5                |
|                       |          | Wood          | 293.2             | 201.1              | 47.1                |
|                       |          | Pellet        | 293.2             | 189.6              | 44.5                |
|                       |          | ASHP          | 0.0               | 42.8               | 7.4                 |
|                       |          | GSHP          | 0.0               | 28.7               | 4.9                 |

Table S15. Annual amount of energy (in MWh) produced extra situ and delivered to the plant for heating, cooling and DHW and the increase ( $\Delta$ ) compared to the case without cooling.

| Benchmark building    | Location | Thermal plant | Thermal energy | Electrical energy | $\Delta_{\text{therm}}$ | $\Delta_{\text{elect}}$ |
|-----------------------|----------|---------------|----------------|-------------------|-------------------------|-------------------------|
| Single-detached house | Turin    | Natural gas   | 10903          | 0                 | 0                       | 0                       |
|                       |          | LPG           | 10903          | 0                 | 0                       | 0                       |
|                       |          | Oil           | 10903          | 0                 | 0                       | 0                       |
|                       |          | Wood          | 11379          | 0                 | 0                       | 0                       |
|                       |          | Pellet        | 10750          | 0                 | 0                       | 0                       |
|                       |          | ASHP          | 0              | 2057              | 0                       | 520                     |
|                       |          | GSHP          | 0              | 1136              | 0                       | 303                     |
|                       | Oulx     | Natural gas   | 14499          | 0                 | 0                       | 0                       |
|                       |          | LPG           | 14499          | 0                 | 0                       | 0                       |
|                       |          | Oil           | 14499          | 0                 | 0                       | 0                       |
|                       |          | Wood          | 15149          | 0                 | 0                       | 0                       |
|                       |          | Pellet        | 14312          | 0                 | 0                       | 0                       |
|                       |          | ASHP          | 0              | 3029              | 0                       | 474                     |
|                       |          | GSHP          | 0              | 1862              | 0                       | 316                     |
| Apartment block       | Turin    | Natural gas   | 32141          | 3570              | 0                       | 3570                    |
|                       |          | LPG           | 32141          | 3578              | 0                       | 3578                    |
|                       |          | Oil           | 32141          | 3588              | 0                       | 3588                    |
|                       |          | Wood          | 33267          | 3592              | 0                       | 3592                    |
|                       |          | Pellet        | 31443          | 3592              | 0                       | 3592                    |
|                       |          | ASHP          | 0              | 6071              | 0                       | 1421                    |
|                       |          | GSHP          | 0              | 3102              | 0                       | 152                     |
|                       | Oulx     | Natural gas   | 45470          | 2238              | 0                       | 2238                    |
|                       |          | LPG           | 45470          | 2238              | 0                       | 2238                    |
|                       |          | Oil           | 45470          | 2240              | 0                       | 2240                    |
|                       |          | Wood          | 47077          | 2236              | 0                       | 2236                    |
|                       |          | Pellet        | 44507          | 2236              | 0                       | 2236                    |
|                       |          | ASHP          | 0              | 10254             | 0                       | 2884                    |
|                       |          | GSHP          | 0              | 5510              | 0                       | 561                     |

### S.3. Sensitivity analysis

The following figures show the sensitivity analysis results for the case studies not reported directly in the article.

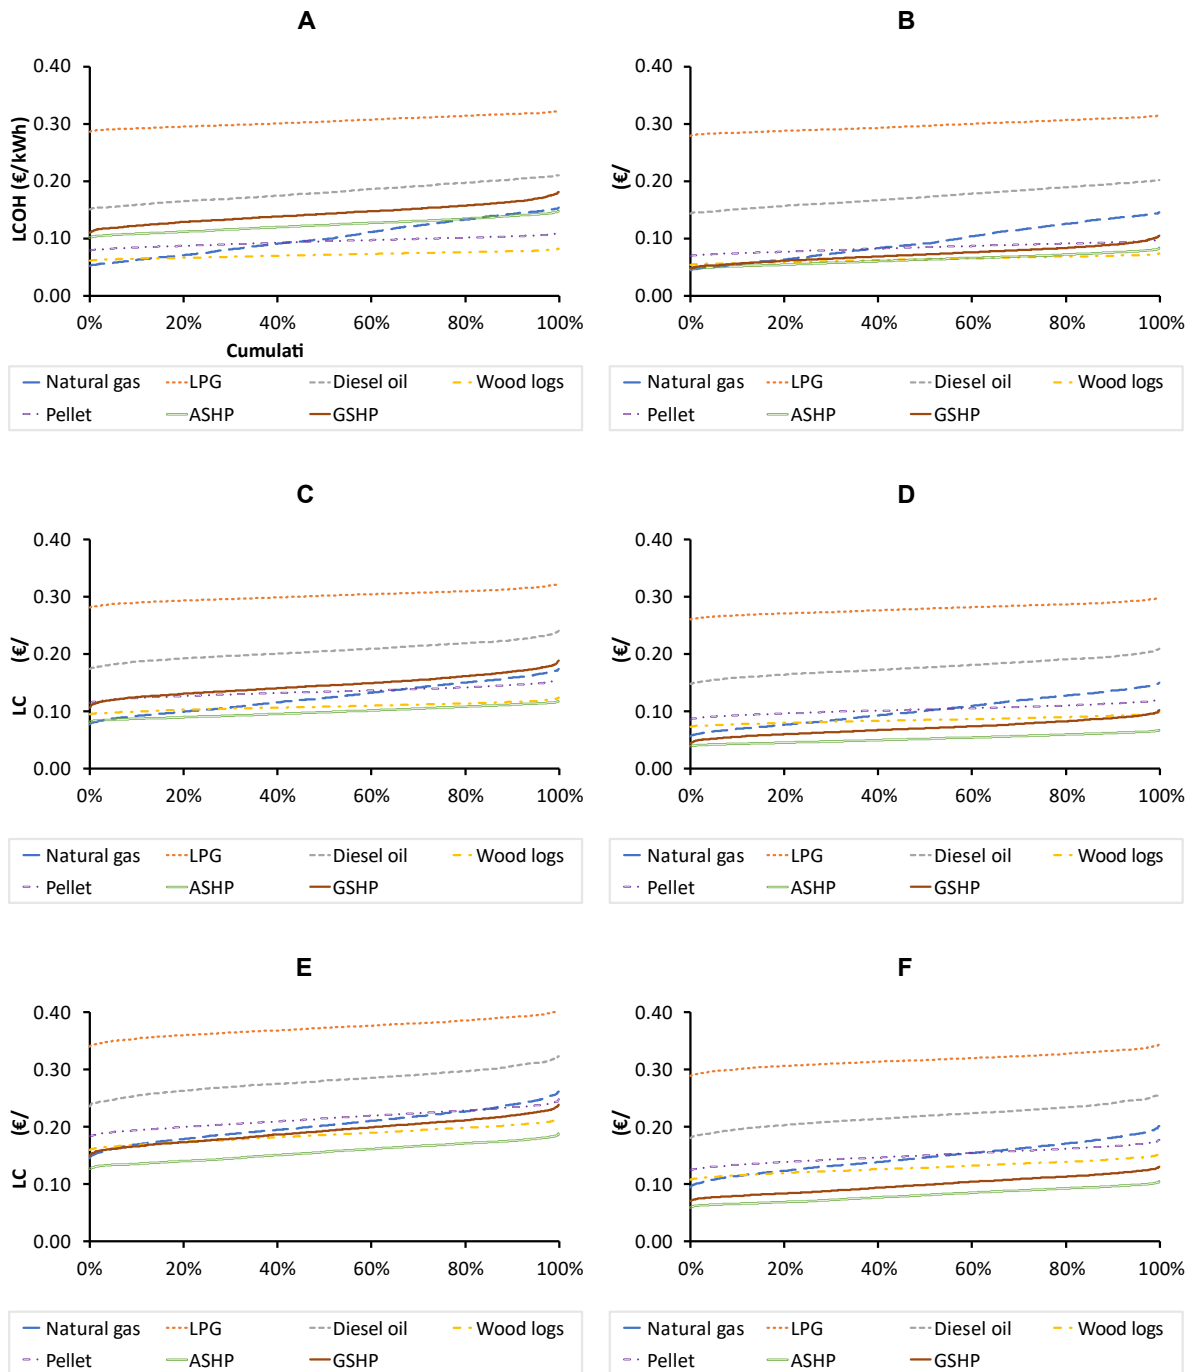

Figure S1. Probabilistic distributions of LCOH values in a detached house in Oulx in the following cases: A) heating-only after partial renovation without incentives; B) heating-only after partial renovation with incentives; C) heating-only after complete renovation without incentives; D) heating-only after complete renovation with incentives; E) heating and cooling after complete renovation without incentives; F) heating and cooling after complete renovation with incentives.

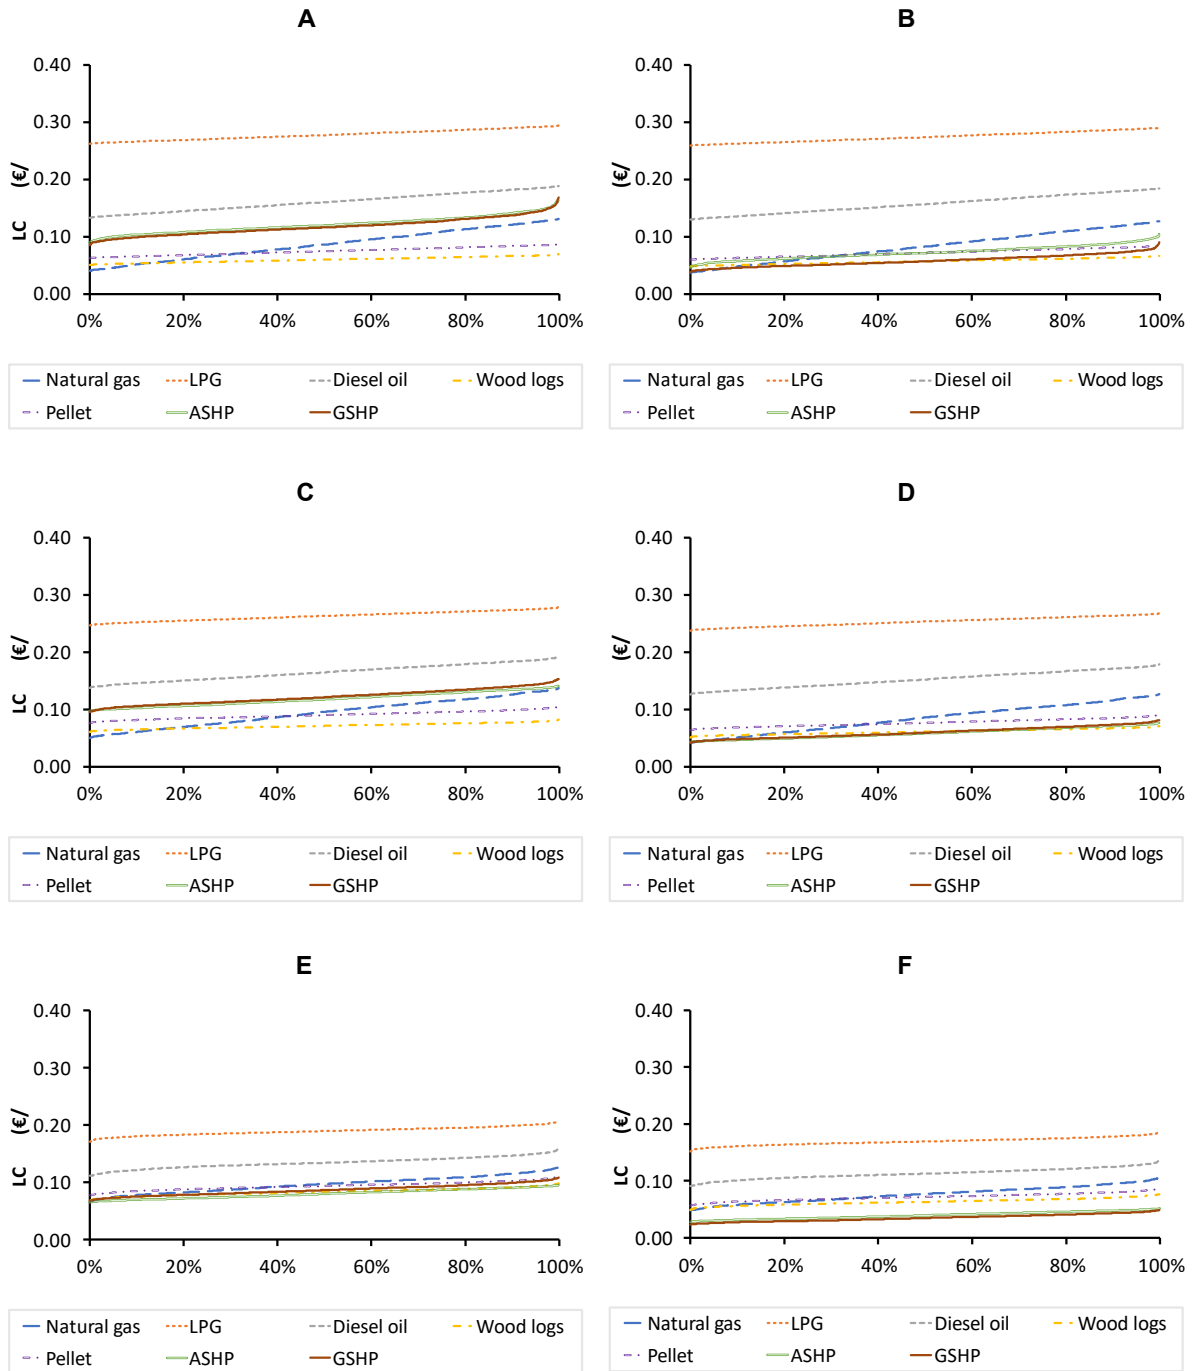

Figure S2. Probabilistic distributions of LCOH values in an apartment block in Turin in the following cases: A) heating-only after partial renovation without incentives; B) heating-only after partial renovation with incentives; C) heating-only after complete renovation without incentives; D) heating-only after complete renovation with incentives; E) heating and cooling after complete renovation without incentives; F) heating and cooling after complete renovation with incentives.

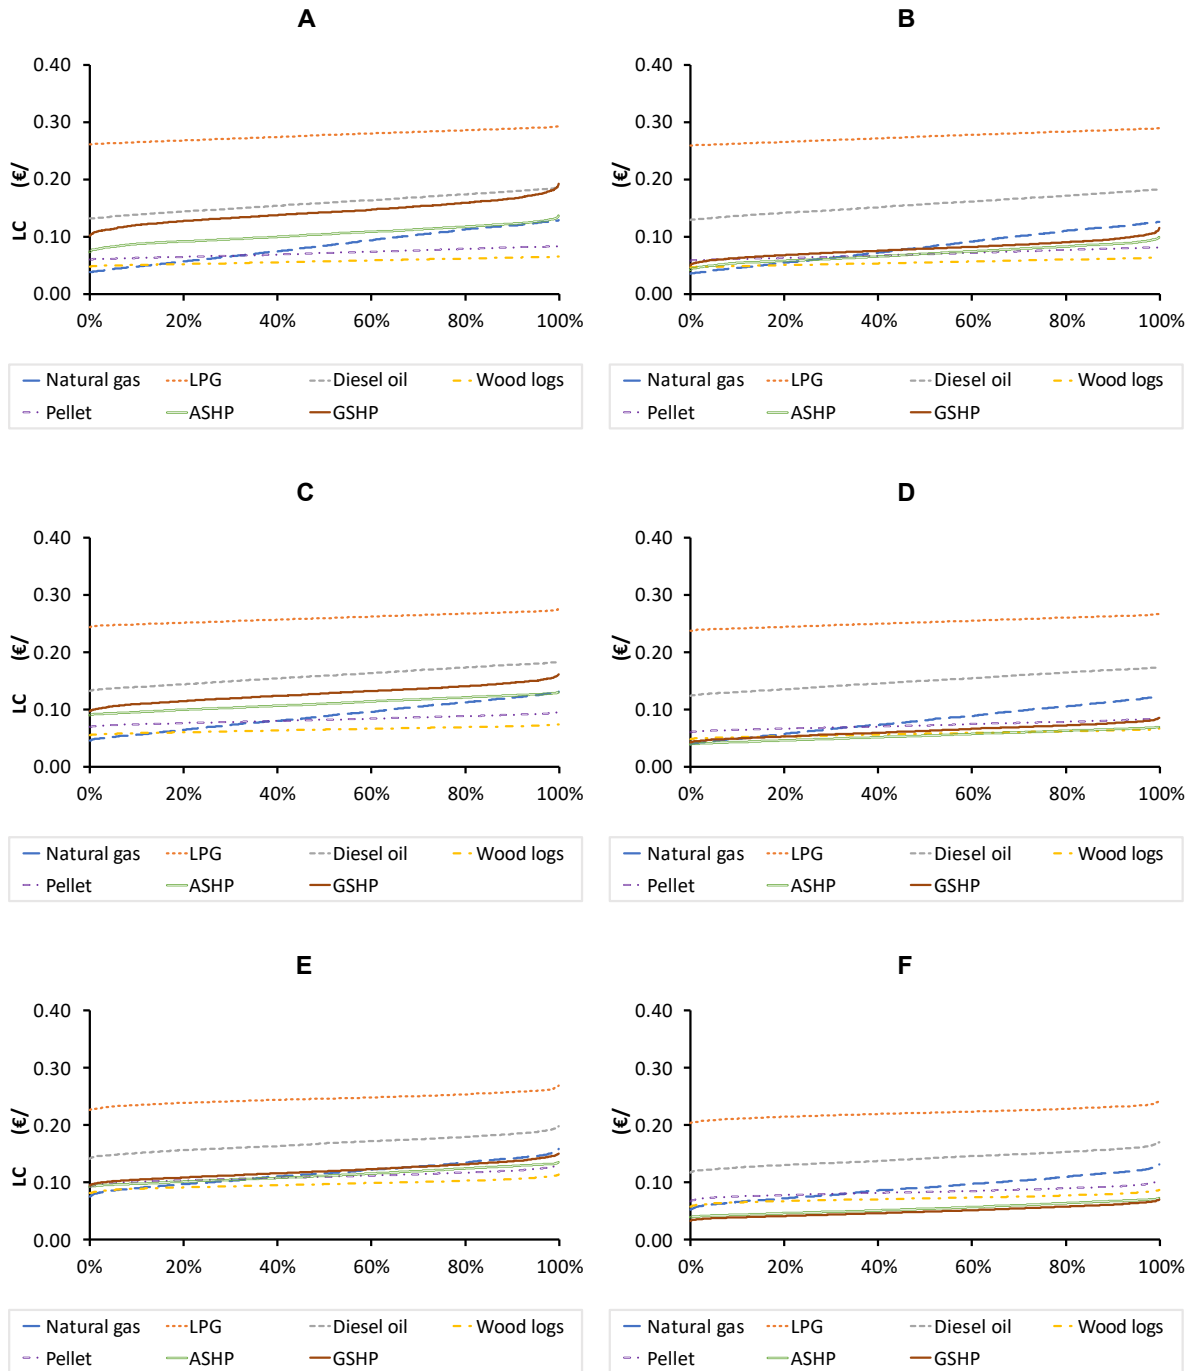

Figure S3. Probabilistic distributions of LCOH values in an apartment block in Oulx in the following cases: A) heating-only after partial renovation without incentives; B) heating-only after partial renovation with incentives; C) heating-only after complete renovation without incentives; D) heating-only after complete renovation with incentives; E) heating and cooling after complete renovation without incentives; F) heating and cooling after complete renovation with incentives.



## Abbreviations and symbols

|            |                                                                                                                      |
|------------|----------------------------------------------------------------------------------------------------------------------|
| ANIT       | Associazione Nazionale per l'Isolamento Termico e acustico (National Association of Thermal and Acoustic Insulation) |
| ASHP       | Air Source Heat Pump                                                                                                 |
| ASHRAE     | American Society of Heating, Refrigerating and Air-Conditioning Engineers                                            |
| BHE        | Borehole Heat Exchanger                                                                                              |
| $C$        | Cost (€)                                                                                                             |
| COP        | Coefficient of Performance                                                                                           |
| DHW        | Domestic Hot Water                                                                                                   |
| DPR        | Decreto del Presidente della Repubblica (Decree of the President of the Republic)                                    |
| $E$        | Energy (kWh)                                                                                                         |
| EED        | Earth Energy Designer                                                                                                |
| $F$        | Annual expenditure for energy sources (€)                                                                            |
| GHG        | Greenhouse Gas                                                                                                       |
| GSE        | Gestore dei Servizi Energetici (Italian energy services managing authority)                                          |
| GSHP       | Ground Source Heat Pump                                                                                              |
| $I$        | Investment cost (€)                                                                                                  |
| INECP      | Integrated National Energy and Climate Plan                                                                          |
| HDD        | Heating Degree Days                                                                                                  |
| HVAC       | Heating, Ventilating, and Air Conditioning                                                                           |
| LCOE       | Levelized Cost of Energy                                                                                             |
| LCOH       | Levelized Cost of Heat                                                                                               |
| LPG        | Liquefied Petroleum Gas                                                                                              |
| O&M        | Operation & Maintenance                                                                                              |
| $P$        | Power (kW)                                                                                                           |
| PV         | Photovoltaic                                                                                                         |
| $R$        | Refund (€)                                                                                                           |
| RES        | Renewable Energy Source                                                                                              |
| VAT        | Value-added tax                                                                                                      |
| $\Delta T$ | Temperature difference                                                                                               |

## References

- BLOCON, 2016. EED – Earth Energy Designer. Version 4.20 [WWW Document]. URL <https://buildingphysics.com/eed-2/>
- Eskilson, P., 1987. Thermal Analysis of Heat Extraction Boreholes [WWW Document]. PhD Thesis - Lund University. URL <http://bit.ly/2JCl6Be>
- Repubblica Italiana, 2011. D.Lgs. 28/2011 - Attuazione della direttiva 2009/28/CE sulla promozione dell'uso dell'energia da fonti rinnovabili, (Legislative Decree 28/2011 on the promotion of renewable energy sources, applying the EC directive 2009/28/EC) [WWW Document]. URL [https://bit.ly/DLgs28\\_2011](https://bit.ly/DLgs28_2011) (accessed 1.4.19).
